# Supplementary material
Source: Springer Nature journal article supplement (https://www.springermedizin.de/resource/supplementary/12935_2010_257_MOESM11_ESM.pdf/9540160)

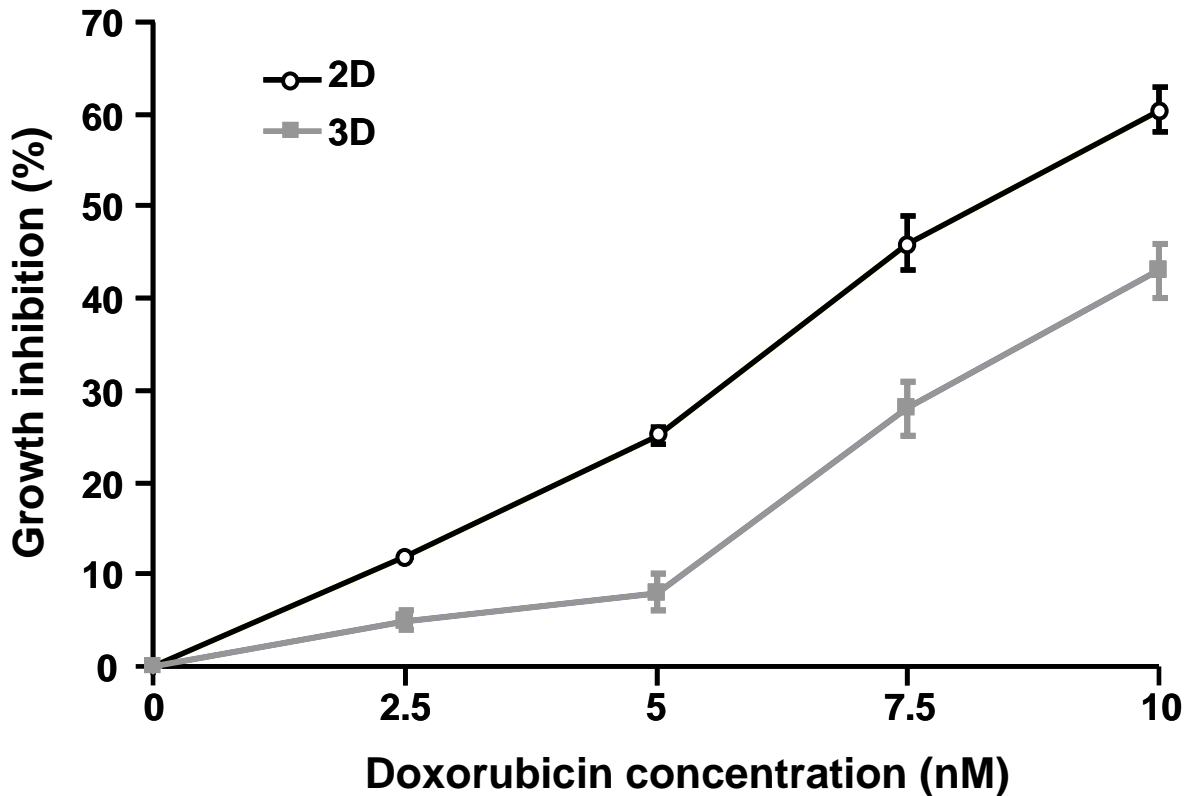

Supplement: MOESM11 [file 9540160]
